# Supplementary material for: Transgenerational Actions of Environmental Compounds on Reproductive Disease and Identification of Epigenetic Biomarkers of Ancestral Exposures
Source: PubMed Central journal article supplement (PMC3289630; doi:10.1371/journal.pone.0031901), 2012-02-28

Supplemental Figure S4. Puberty Analysis in the F1 and F2 generations

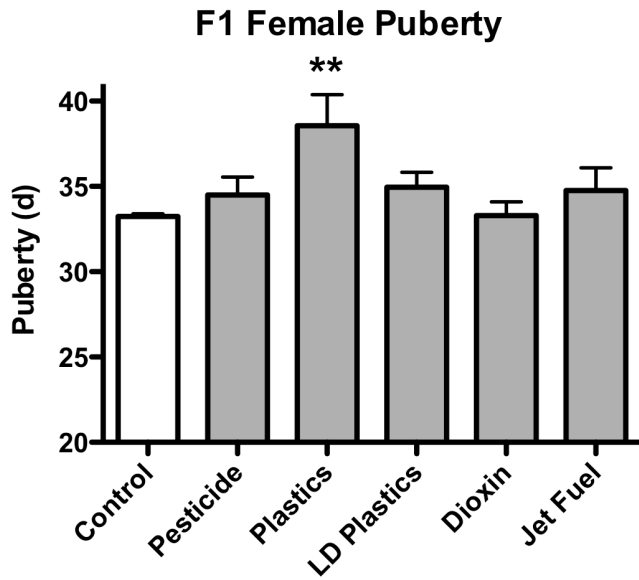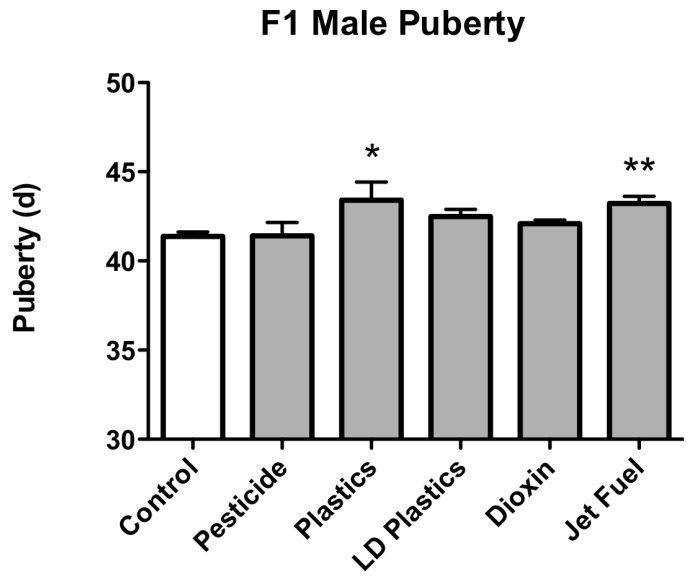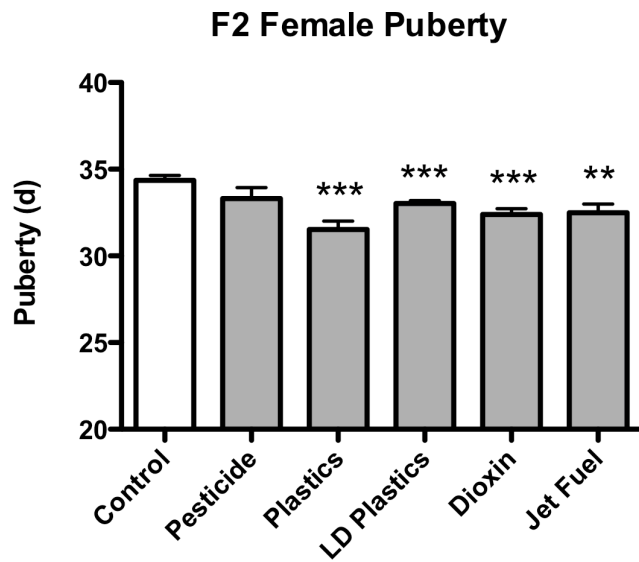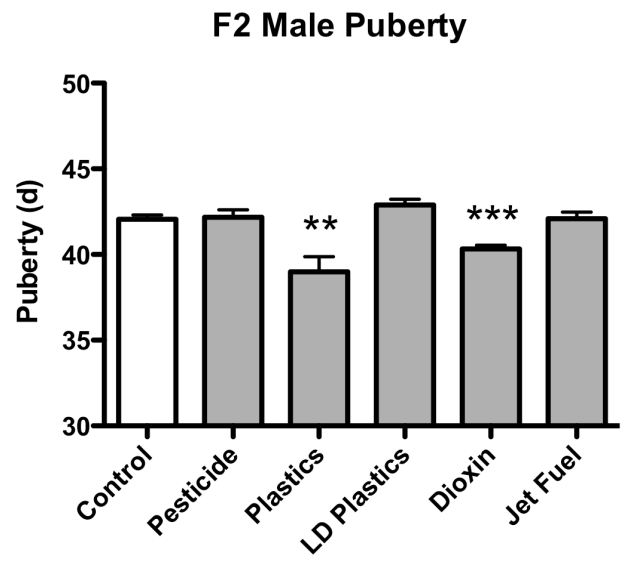

Supplement: pone.0031901.s004.pdf [file pone.0031901.s004.pdf]
