# Supplementary material for: Transgenerational Actions of Environmental Compounds on Reproductive Disease and Identification of Epigenetic Biomarkers of Ancestral Exposures
Source: PLOS journal article supplement (doi:10.1371/journal.pone.0031901), 2012-02-28

Supplemental Figure S2. Weaning weights in F1-F3 generations

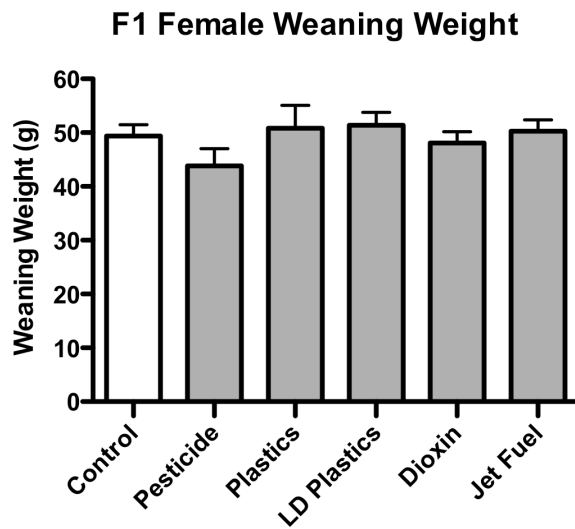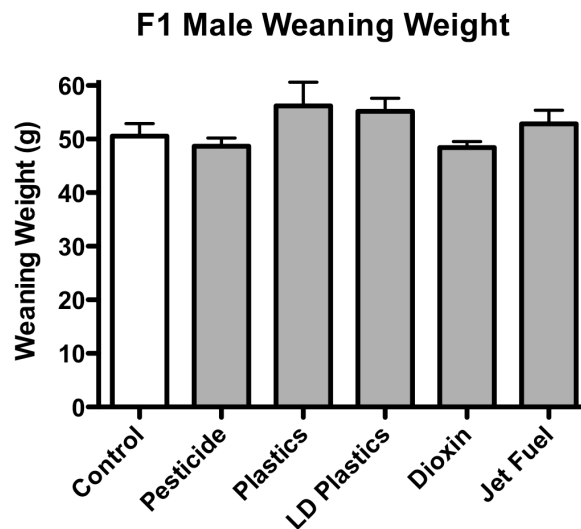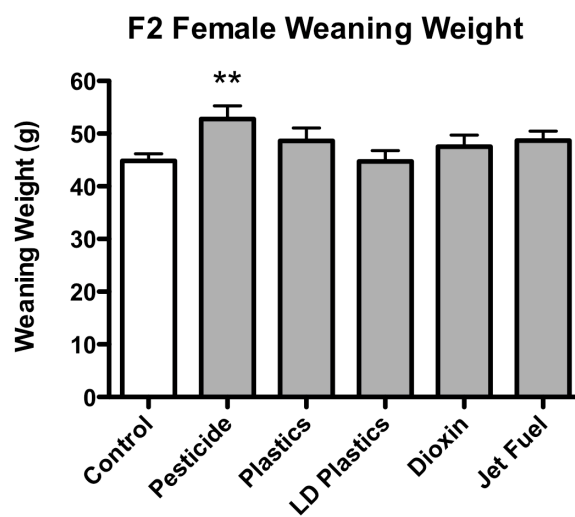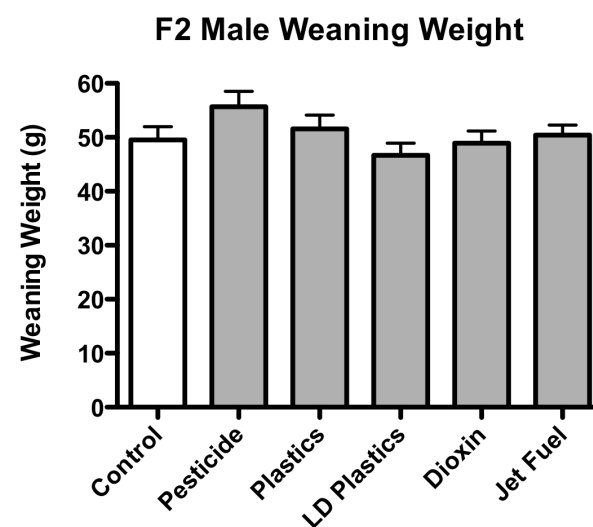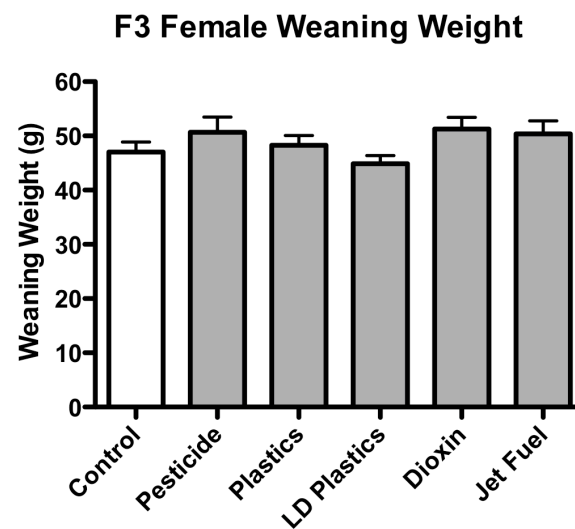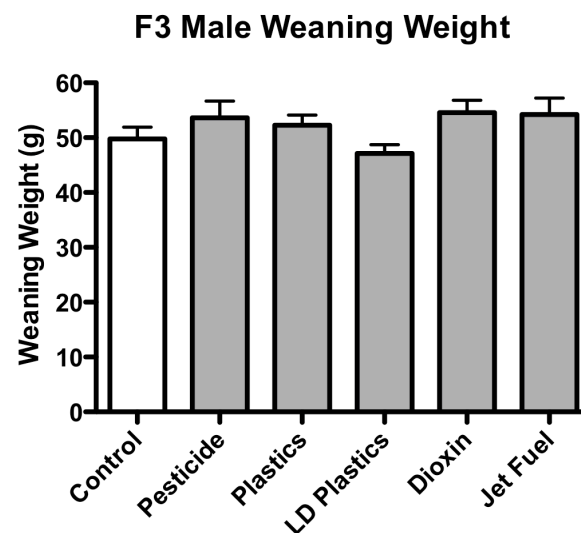

Supplement: S2 (10.1371/journal.pone.0031901.s002) [file journal.pone.0031901.s002]
