# Supplementary material for: Transgenerational Actions of Environmental Compounds on Reproductive Disease and Identification of Epigenetic Biomarkers of Ancestral Exposures
Source: PLOS journal article supplement (doi:10.1371/journal.pone.0031901), 2012-02-28

Supplemental Figure S6. Analysis of onset of puberty in (A) female and (B) male rats

**(A)**

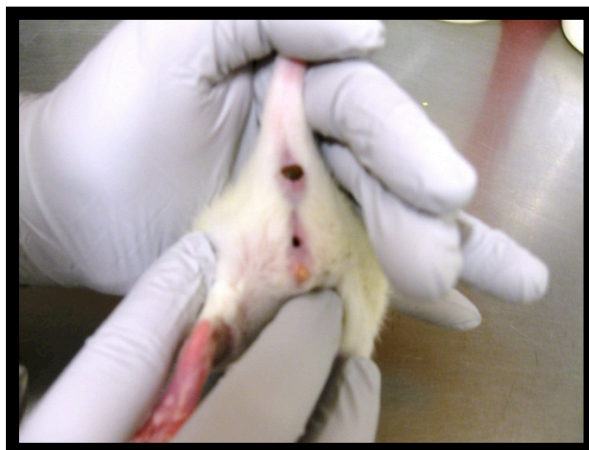

**(B)**

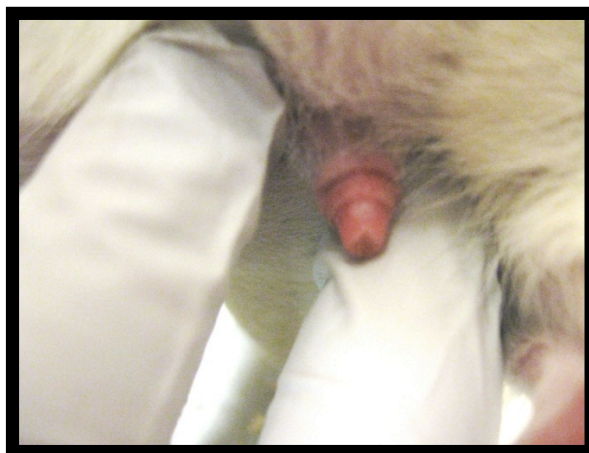

Supplement: S6 (10.1371/journal.pone.0031901.s006) [file journal.pone.0031901.s006]
