# Supplementary material for: Transgenerational Actions of Environmental Compounds on Reproductive Disease and Identification of Epigenetic Biomarkers of Ancestral Exposures
Source: PLOS journal article supplement (doi:10.1371/journal.pone.0031901), 2012-02-28
Supplement: S9 (10.1371/journal.pone.0031901.s009) [file journal.pone.0031901.s009]

**Table S3. Pathways influenced by genes associated with DMR**

|                                                                                                                                                                                                                                      | All Exposures                              | Pesticides | Plastics   | Dioxin    | Hydrocarbons |
|--------------------------------------------------------------------------------------------------------------------------------------------------------------------------------------------------------------------------------------|--------------------------------------------|------------|------------|-----------|--------------|
| <b>Number of unique genes in the list</b>                                                                                                                                                                                            | <b>479</b>                                 | <b>351</b> | <b>191</b> | <b>47</b> | <b>33</b>    |
| <b>Pathway Name</b>                                                                                                                                                                                                                  | <b>Number of affected genes in pathway</b> |            |            |           |              |
| Pathways in cancer                                                                                                                                                                                                                   | 11                                         | 8          | 5          | 2         |              |
| MAPK signaling pathway                                                                                                                                                                                                               | 10                                         | 8          | 4          | 1         | 1            |
| Cell adhesion molecules (CAMs)                                                                                                                                                                                                       | 9                                          | 7          | 5          |           | 1            |
| Phagosome                                                                                                                                                                                                                            | 9                                          | 7          | 4          | 1         | 1            |
| Axon guidance                                                                                                                                                                                                                        | 9                                          | 5          | 2          | 3         | 2            |
| Endocytosis                                                                                                                                                                                                                          | 9                                          | 4          | 5          | 1         | 2            |
| Focal adhesion                                                                                                                                                                                                                       | 8                                          | 8          | 3          | 1         |              |
| Regulation of actin cytoskeleton                                                                                                                                                                                                     | 8                                          | 6          | 3          | 2         |              |
| Neurotrophin signaling pathway                                                                                                                                                                                                       | 7                                          | 7          | 3          | 2         |              |
| Olfactory transduction                                                                                                                                                                                                               | 7                                          | 4          | 3          | 1         | 1            |
| Antigen processing and presentation                                                                                                                                                                                                  | 7                                          | 3          | 3          |           | 2            |
| Chemokine signaling pathway                                                                                                                                                                                                          | 6                                          | 5          | 3          | 3         |              |
| Protein processing in endoplasmic reticulum                                                                                                                                                                                          | 6                                          | 4          | 2          |           | 1            |
| Neuroactive ligand-receptor interaction                                                                                                                                                                                              | 6                                          | 3          | 1          | 2         |              |
| Hypertrophic cardiomyopathy (HCM)                                                                                                                                                                                                    | 5                                          | 5          | 3          |           |              |
| Dilated cardiomyopathy                                                                                                                                                                                                               | 5                                          | 5          | 3          |           |              |
| Alzheimer's disease                                                                                                                                                                                                                  | 5                                          | 5          |            |           |              |
| Insulin signaling pathway                                                                                                                                                                                                            | 5                                          | 4          | 2          | 2         | 1            |
| Cell cycle                                                                                                                                                                                                                           | 5                                          | 4          | 2          |           |              |
| Viral myocarditis                                                                                                                                                                                                                    | 5                                          | 3          | 3          |           | 1            |
| Purine metabolism                                                                                                                                                                                                                    | 5                                          | 3          | 1          | 1         |              |
| Type I diabetes mellitus                                                                                                                                                                                                             | 5                                          | 2          | 2          | 1         | 1            |
| <p>KEGG pathway enrichment for each exposure lineage regarding genes associated with differentially methylated regions (DMR) in F3 generation sperm. Top signaling and cellular pathways with 5 or greater total genes involved.</p> |                                            |            |            |           |              |
